# Supplementary material
Source: publisher figshare collection journal article supplement (https://acs.figshare.com/ndownloader/files/24540061)
Supplement: Supplementary file 1 [file 24540061]

## **Supporting Information**

# **Carbon Dots Derived from Citric Acid and Glutathione as a Highly Efficient Intracellular Reactive Oxygen Species Scavenger for Alleviating the Lipopolysaccharide-Induced Inflammation in Macrophages**

Huibo Wang, MengLing Zhang, Yurong Ma, Bo Wang, Hui Huang\*, Yang Liu\*, Mingwang Shao,  
and Zhenhui Kang\*

Institute of Functional Nano & Soft Materials (FUNSOM), Jiangsu Key Laboratory for Carbon-Based Functional Materials & Devices, Soochow University, 199 Ren'ai Road, Suzhou, 215123, China

E-mail: zhkang@suda.edu.cn; yangl@suda.edu.cn. hhuang0618@suda.edu.cn.

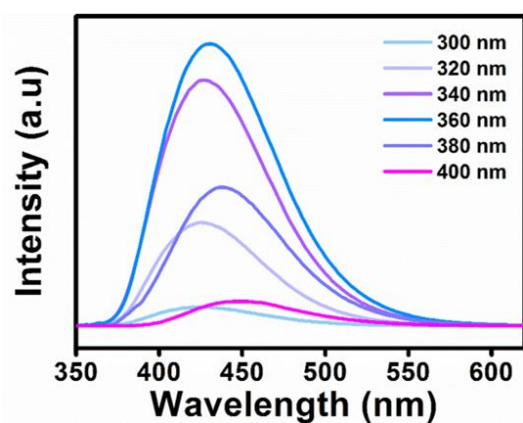

**Figure S1.** Fluorescence emission spectra of CDs under different excitations from 300 nm to 400 nm.

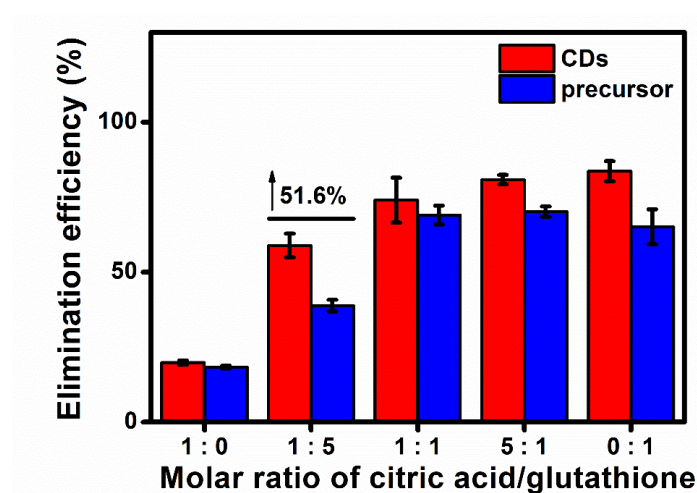

**Figure S2.** The elimination efficiency of CDs and precursors (citric acid and glutathione) at same mass concentration with different molar ratios toward to DPPH•.

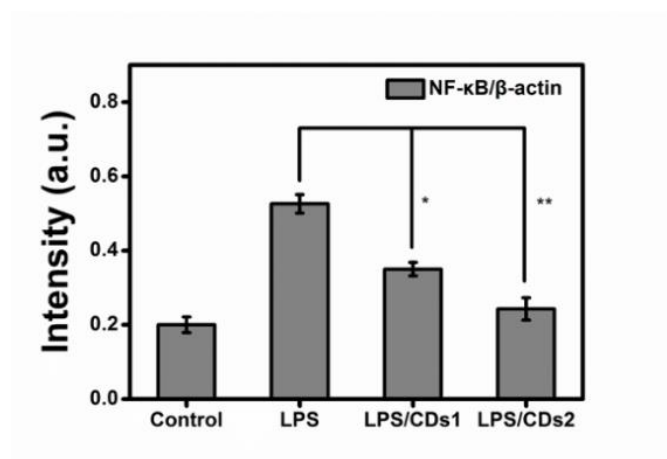

**Figure S3.** The western blot grey analysis of NF-κB signaling pathway relative to β-actin set as reference.
